# Supplementary material for: Doctors’ Perceptions, Attitudes and Practices towards the Management of Multidrug-Resistant Organism Infections after the Implementation of an Antimicrobial Stewardship Programme during the COVID-19 Pandemic
Source: Trop Med Infect Dis. 2021 Feb 5;6(1):20. doi: 10.3390/tropicalmed6010020 (PMC7930958; doi:10.3390/tropicalmed6010020)
Supplement: Supplementary file 1 [file tropicalmed-06-00020-s001.pdf]

## Questionnaire

### General information

1. Age:

2. Gender:

Male ☐

Female ☐

3. What is your professional status?

Resident doctor ☐

Specialist doctor ☐

4. What is your specialty;

Vascular surgery ☐

Haematology ☐

Gastroenterology ☐

General practice ☐

General surgery ☐

Dermatology ☐

Endocrinology ☐

Cardiology ☐

Cardiac surgery ☐

Neurology ☐

Neurosurgery ☐

Nephrology ☐

Orthopaedic ☐

Urology ☐

Ophthalmology ☐

Internal medicine ☐

Oncology ☐

Obstetrics & Gynaecology ☐

Plastic surgery ☐

Respiratory medicine ☐

Rheumatology ☐

Psychiatry ☐

ENT ☐

Thoracic surgery ☐

ICU ☐

Craniofacial surgery ☐

5. How many years of experience do you have as a doctor? (If you are a specialist doctor, please report only the years of experience you have as a specialist doctor)

6. Do you have previous experience (>3 months) with antimicrobial stewardship programmes (ASPs)?

Yes ☐

No ☐

7. How often do you have patients with multidrug-resistant (MDR) Gram-negative infections under your care?

Not at all ☐

1-4 times/month ☐

5-10 times/month ☐

>10 times/month ☐

8. How often do you seek ASP consultation for patients with MDR Gram-negative infections who are under your care?

Not at all ☐

1-4 times/month ☐

5-10 times/month ☐

>10 times/month ☐

9. How often do you accept the recommendations provided by the ASP team?

Never ☐

Rarely ☐

Sometimes ☐

Often ☐

Always ☐

### Perceptions

**10.** How much do you disagree or agree with each of the following statements?

1 = Strongly disagree, 2 = Disagree, 3 = Neutral, 4 = Agree, 5 = Strongly agree

- Prospective audit and feedback strategy is more effective than preauthorization strategy in improving patients' outcome  
☐1      ☐2      ☐3      ☐4      ☐5
- Prospective audit and feedback strategy is more educational for me than preauthorization strategy  
☐1      ☐2      ☐3      ☐4      ☐5
- Preauthorization strategy suits a Greek hospital better than prospective audit and feedback strategy  
☐1      ☐2      ☐3      ☐4      ☐5
- Preauthorization strategy should substitute prospective audit and feedback strategy in our hospital  
☐1      ☐2      ☐3      ☐4      ☐5
- Regardless of the strategy followed, the implementation of an ASP improves patients' outcome compared to the absence of such a program  
☐1      ☐2      ☐3      ☐4      ☐5

**11.** How much do you disagree or agree with each of the following statements regarding in-person consultation as the followed practice for the ASP in our hospital?

1 = Strongly disagree, 2 = Disagree, 3 = Neutral, 4 = Agree, 5 = Strongly agree

- It is the preferred practice for the ASP  
☐1      ☐2      ☐3      ☐4      ☐5
- It can be largely replaced by telephone or electronic communication

☐1                      ☐2                      ☐3                      ☐4                      ☐5

- It is welcome as often as possible

☐1                      ☐2                      ☐3                      ☐4                      ☐5

- It is also a very useful educational process for me regarding prudent use of antimicrobials

☐1                      ☐2                      ☐3                      ☐4                      ☐5

- It disrupts my daily life in the clinic

☐1                      ☐2                      ☐3                      ☐4                      ☐5

**12. How helpful do you find each of the following interventions for the improvement of the current ASP?**

|                                                                                                      |
|------------------------------------------------------------------------------------------------------|
| 1 = Not helpful, 2 = Slightly helpful, 3 = Somewhat helpful, 4 = Very helpful, 5 = Extremely helpful |
|------------------------------------------------------------------------------------------------------|

- Availability of hospital resistance data and development of hospital guidelines for the treatment of infections caused by multidrug-resistant organisms

☐1                      ☐2                      ☐3                      ☐4                      ☐5

- More educational sessions and training regarding optimal use of antimicrobials

☐1                      ☐2                      ☐3                      ☐4                      ☐5

- Stewardship-focused mobile/tablet applications

☐1                      ☐2                      ☐3                      ☐4                      ☐5

- More contact via telephone with ASP team members

☐1                      ☐2                      ☐3                      ☐4                      ☐5

- Communication via hospital's electronic systems

☐1                      ☐2                      ☐3                      ☐4                      ☐5

**13.** During COVID-19 pandemic, the ASP must be:

- continued and further developed ☐  
postponed ☐

*Attitudes and Practices*

**14.** The existence of the ASP in our hospital:

|                                                                                |
|--------------------------------------------------------------------------------|
| 1 = Not at all, 2 = Slightly, 3 = Moderately, 4 = Significantly, 5 = Extremely |
|--------------------------------------------------------------------------------|

- Increased my concern regarding overuse/misuse of antimicrobials and antimicrobial resistance  
☐1              ☐2              ☐3              ☐4              ☐5
  
- Amplified my awareness regarding appropriate use of antimicrobials in my daily clinical practice  
☐1              ☐2              ☐3              ☐4              ☐5
  
- Stimulated me to seek further knowledge on selecting the optimal antimicrobial, whenever it is needed, and its dosage, route and duration of administration  
☐1              ☐2              ☐3              ☐4              ☐5
  
- Reinforced my acknowledgement of the importance of microbiological analyses for infections' diagnosis and treatment  
☐1              ☐2              ☐3              ☐4              ☐5
  
- Incited me to perform closer monitoring of the microbiological data of my patients  
☐1              ☐2              ☐3              ☐4              ☐5
  
- Enriched my way of thinking about the diagnosis and treatment of infections caused by multidrug-resistance organisms

☐1                      ☐2                      ☐3                      ☐4                      ☐5

- Affected me towards multidisciplinary and personalised care of patients with infections caused by multidrug-resistant organisms

☐1                      ☐2                      ☐3                      ☐4                      ☐5

- Influenced my daily practice towards more rigorous implementation of infection prevention and control measures

☐1                      ☐2                      ☐3                      ☐4                      ☐5

**15.** Would you be willing to participate more actively in the ASP in the future?

Yes    ☐                      No    ☐
